# Supplementary material for: AtGCS promoter-driven clustered regularly interspaced short palindromic repeats/Cas9 highly efficiently generates homozygous/biallelic mutations in the transformed roots by Agrobacterium rhizogenes–mediated transformation
Source: Frontiers journal article supplement (doi:10.3389/fpls.2022.952428), 2022-10-18

**FIGURE S3**

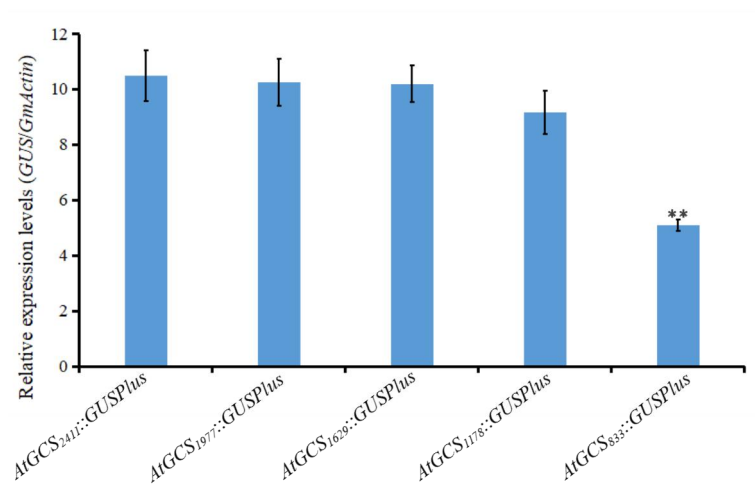

Supplement: Image_3.pdf [file Image_3.pdf]
