# Supplementary material for: AtGCS promoter-driven clustered regularly interspaced short palindromic repeats/Cas9 highly efficiently generates homozygous/biallelic mutations in the transformed roots by Agrobacterium rhizogenes–mediated transformation
Source: Frontiers journal article supplement (doi:10.3389/fpls.2022.952428), 2022-10-18

FIGURE S8

A

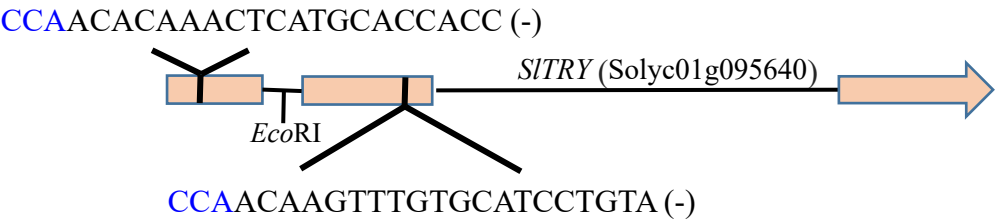

B

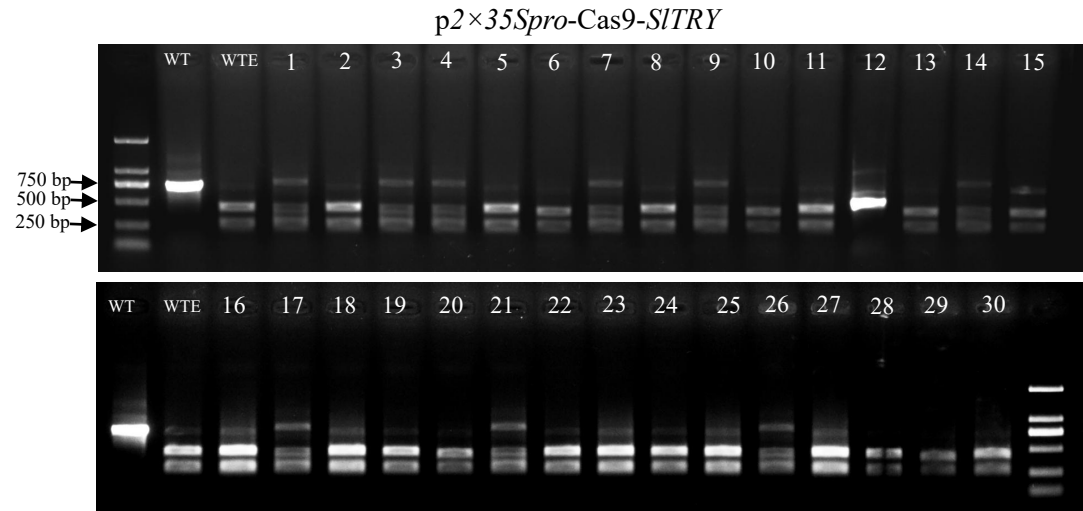

C

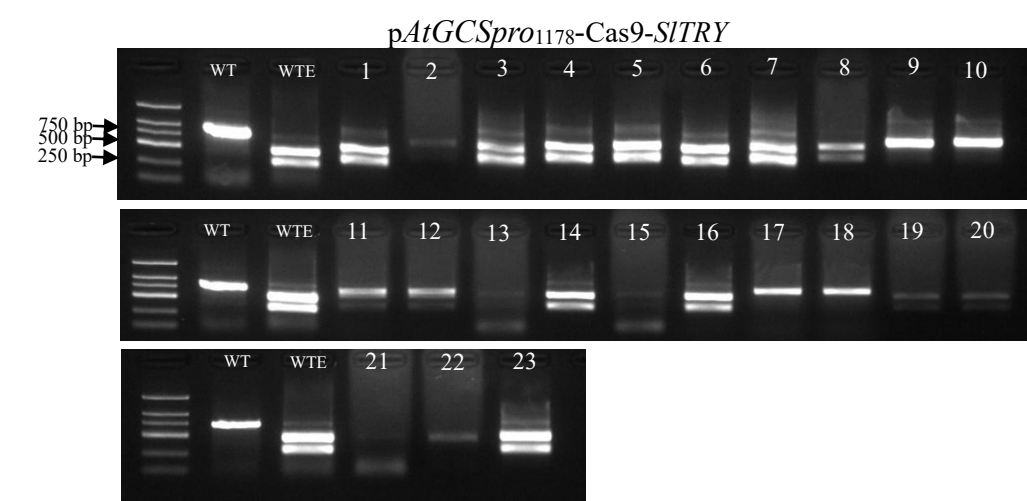

D

Line #T1 target site 1: a 1 bp insertion; target site 2: a 73 bp deletion)

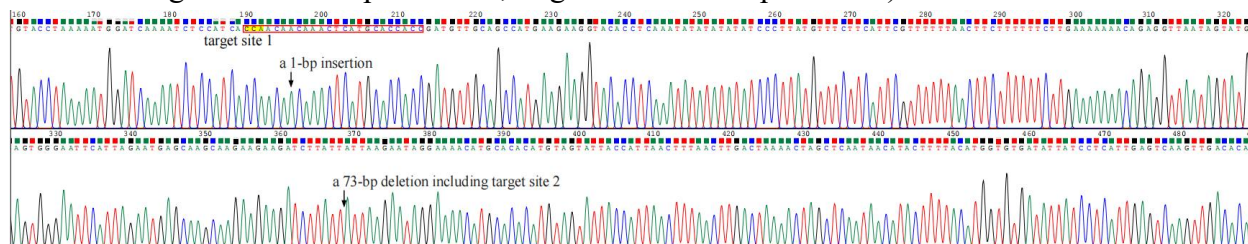

line#T3-2 (target site 1: a 1 bp insertion; target site 2: a 7 bp deletion)

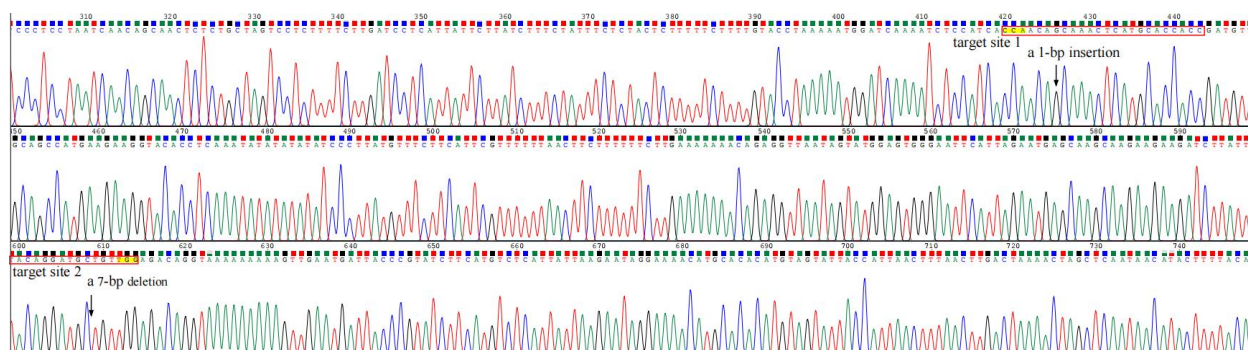

line#T3-3 (target site 1: a 1 bp deletion; target site 2: a 175 bp deletion and a 11 bp insertion)

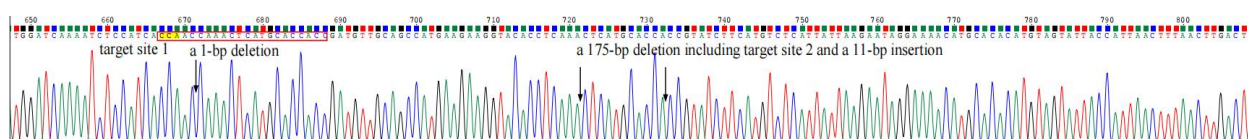

line#T9 (target site 1 and 2: a 189 bp deletion)

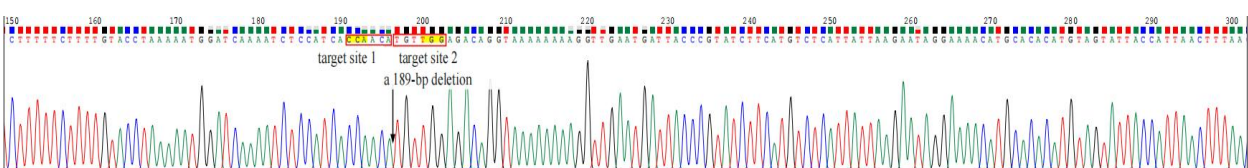

line#T13-3 (target site 1: a 3 bp deletion; target site 2: a 1 bp deletion)

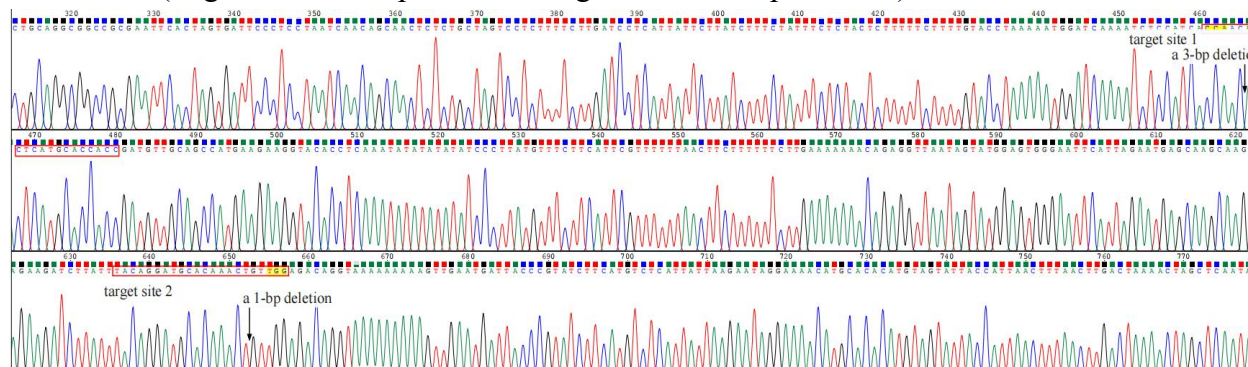

line#T16-5 (target site 1: a 1 bp insertion; target site 2: a 74 bp deletion)

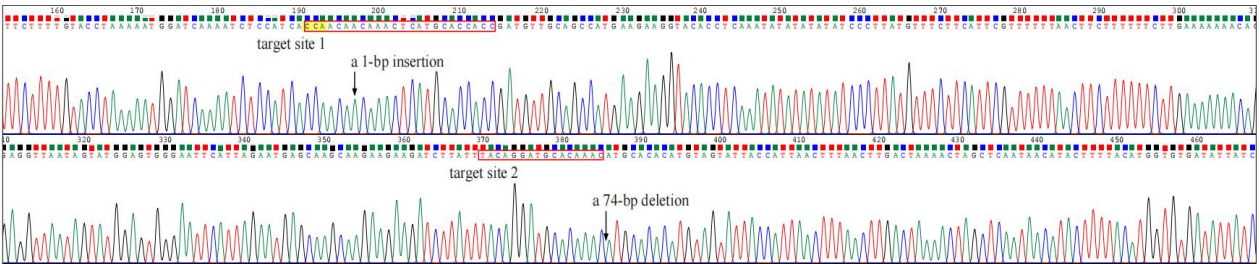

line#T18-2 (target site 1: a 1 bp insertion; target site 2: a 107 bp deletion)

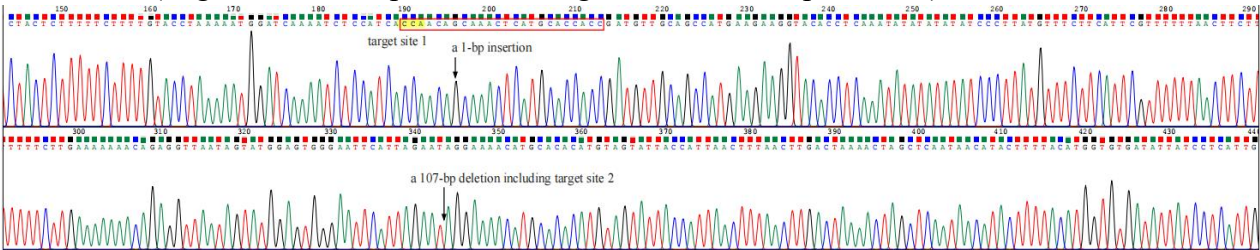

Supplement: Image_8.pdf [file Image_8.pdf]
